# Supplementary material for: ZnII-induced conformational control of amphiphilic cavitands in Langmuir monolayersElectronic supplementary information (ESI) available: characterization of 1 and 2; protocol of Langmuir experiments performed on the water subphase at different pH; Job plot analysis. See http://www.rsc.org/suppdata/cc/b4/b405331a/
Source: Royal Society of Chemistry journal article supplement (doi:10.1039/b405331a), 2004-01-01

## Electronic Supplementary Information

**ZnII-induced conformational control of amphiphilic cavitands in *Langmuir* monolayers**

Markus Frei, Federica Marotti and François Diederich***

*Laboratorium für Organische Chemie, ETH-Hönggerberg, CH-8093 Zürich, Switzerland.*

*E-mail:* [*diederich@org.chem.ethz.ch*](mailto:diederich@org.chem.ethz.ch)

**I. Characterisation ESI**

Cavitand **1**

Mp >300 ºC; **max(neat)/cm-1  2950*w*, 1732*s*, 1608*w*, 1574*w*, 1483*s*, 1415*s*, 1365*m*, 1332*s*, 1260*m*, 1222*m*, 1165*s*, 1116*m*, 1071*m*, 1007*m*; **H(300 MHz; CDCl3) 8.18 (4 H, s), 7.82-7.75 (8 H, m), 7.50-7.43 (8 H, m), 7.29 (4 H, s), 5.65 (4 H, t, *J* 8.1), 3.73 (12 H, s), 2.53 (8 H, t, *J* 6.9), 2.43-2.32 (8 H, m), 1.82-1.68 (8 H, m); **C(75 MHz; CDCl3) 174.1, 152.8, 152.6, 139.8, 135.7, 129.2, 127.9, 123.6, 119.1, 51.8, 34.5, 33.7, 31.8, 23.5; HR-MALDI-MS (DHB): calcd for C80H64N8O16Na+ ([*M* + Na]+): 1415.4333; found 1415.4332.

Velcrand **2**

Mp >300 °C; **max(neat)/cm-1 2950*w*, 1732*s*, 1567*w*, 1409*s*, 1364*m*, 1331*s*, 1235*s*, 1165*s*, 1141*s*, 1069*s*, 1015*m*; **H(300 MHz; CDCl3) 7.78 (4 H, d, *J* 7.8), 7.66 (4 H, t, *J* 7.7), 7.46 (4 H, t, *J* 7.5), 7.17 (4 H, d *J* 8.1), 6.85 (2 H, s), 6.20 (2 H, s), 3.6-3.5 (4 H, m), 3.39 (12 H, s), 3.14 (6 H, s), 2.26 (6 H, s), 2.25-2.14 (8 H, m), 2.13-1.98 (4 H, m), 1.88-1.72 (4 H, m), 1.59-1.44 (4 H, m), 1.42-1.28 (4 H, m); **C(75 MHz; CDCl3) 173.2, 152.5, 150.7, 148.9, 145.7, 138.0, 137.2, 133.7, 129.1, 129.0, 128.5, 128.2, 127.5, 127.1, 122.8, 118.7, 117.1, 51.4, 37.9, 33.1, 31.1, 22.3; HR-MALDI-MS (DHB): calcd for C84H72N8O16Na+ ([*M* + Na]+): 1471.4959; found 1471.4974.

**II.** **Langmuir Studies ESI**

Data were collected with a NIMA system (611D/2B/1PTFE/WIN/CAB) using a Teflon trough and symmetrical hydrophilic barriers. All isotherms were taken at room temperature. The ultrapure water (** = 18.2 M cm) used for the subphase was obtained from the Milli-Q Plus Ultra-pure water system from Millipore. Surface pressure was measured with a platinum plate. Solutions of 2.2 mg/cm3 (cavitand **1**) and 0.32 mg/cm3 (velcrand **2**) concentration were prepared in chloroform. Usually, 0.025 cm3 of these solutions was spread on the water surface using a microsyringe. Films were left to equilibrate for 30 min before any measurements were started. The monolayers were compressed at a typical speed of 20 cm2/min. The experiments were repeated three times to ensure accuracy.

# Langmuir experiments performed with trifluoroacetic acid (TFA) in the water subphase

The experiments were performed by dispersing 0.025 cm3 of spreading solution of cavitand **1**, prepared by dissolving the compound in CHCl3 (1.6 x 10-3 mM), on the water subphase at pH = 7 (black curve), and on the acidic water subphase at different pH (addition of TFA): pH = 3 (blue curve), pH = 2 (green curve) and pH = 1 (red curve) (Fig. ESI 1). The limiting area per cavitand molecule **1**, obtained on the neutral water subphase (black curve) was approximately 125 Å2 and corresponds to the calculated value (120 Å2) for the *vase* conformation. When the concentration of TFA increases, the area per molecule increases to *ca.* 225 Å2 (red curve, obtained at pH = 1). This value is in good agreement with the calculated value corresponding to the *kite* conformation (290 Å2); the difference presumably arises from the fact that, under the experimental conditions, not all cavitands are fully protonated and, hence, fully conformationally switched.

**Fig. ESI 1** Pressure-area (-A) isotherms of a monolayer of cavitand **1** on a Millipore water subphase at pH = 7 (black line), pH = 3 (blue line), pH = 2 (green line) and pH = 1 (red line).


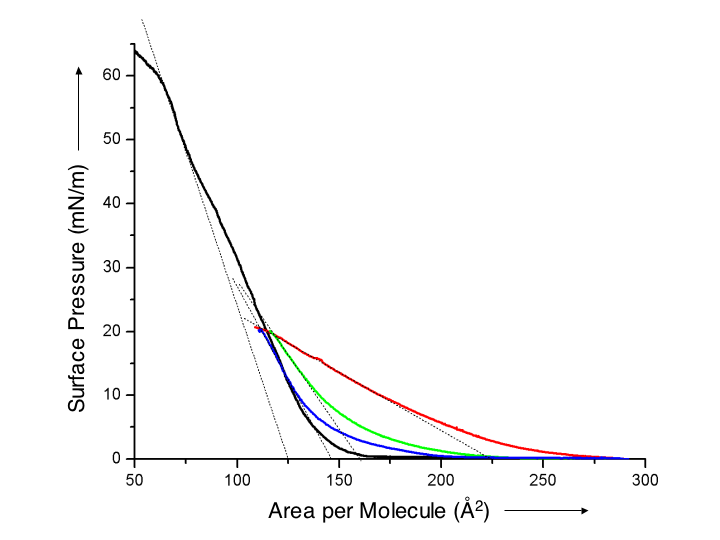


**III. Determination of the binding stoichiometry by Job Plot analysis ESI**

The 1:2 stoichiometry of the **3**•(ZnII)2 complexes in the *kite* form was confirmed as follows. Two stock solutions were prepared; solution A: 5 mM of **3** in CDCl3; solution B: 5 mM of ZnI2 and 12.5 mM of CD3OD in CDCl3. Ten 5-mm NMR tubes were filled with solutions A and B in the following ratios: 60:540, 120:480, 180:420, 240:360, 300:300, 360:240, 420:180, 480:120, 540:60, 600:0 cm3. 1H NMR spectra were recorded at 300 MHz for each mixture. The concentration of the **3**•(ZnII)2 complexes was calculated as follows: [host•guest] = ([**3**]tot) (**obs- **r)/( ****3-** **r), where [**3**]tot = the total concentration of **3** in solution, **obs = observed chemical shift, **r = chemical shift of the methine proton of **3**, ****3** = chemical shift of the methine proton of **3** in the **3**•(ZnII)2 complex (measured value at saturation). The experiments were repeated three times to ensure accuracy.

**Fig. ESI 2** Job plot to prove the 1:2 binding stoichiometry of the *kite* complex **3**•(ZnII)2 in CDCl3.


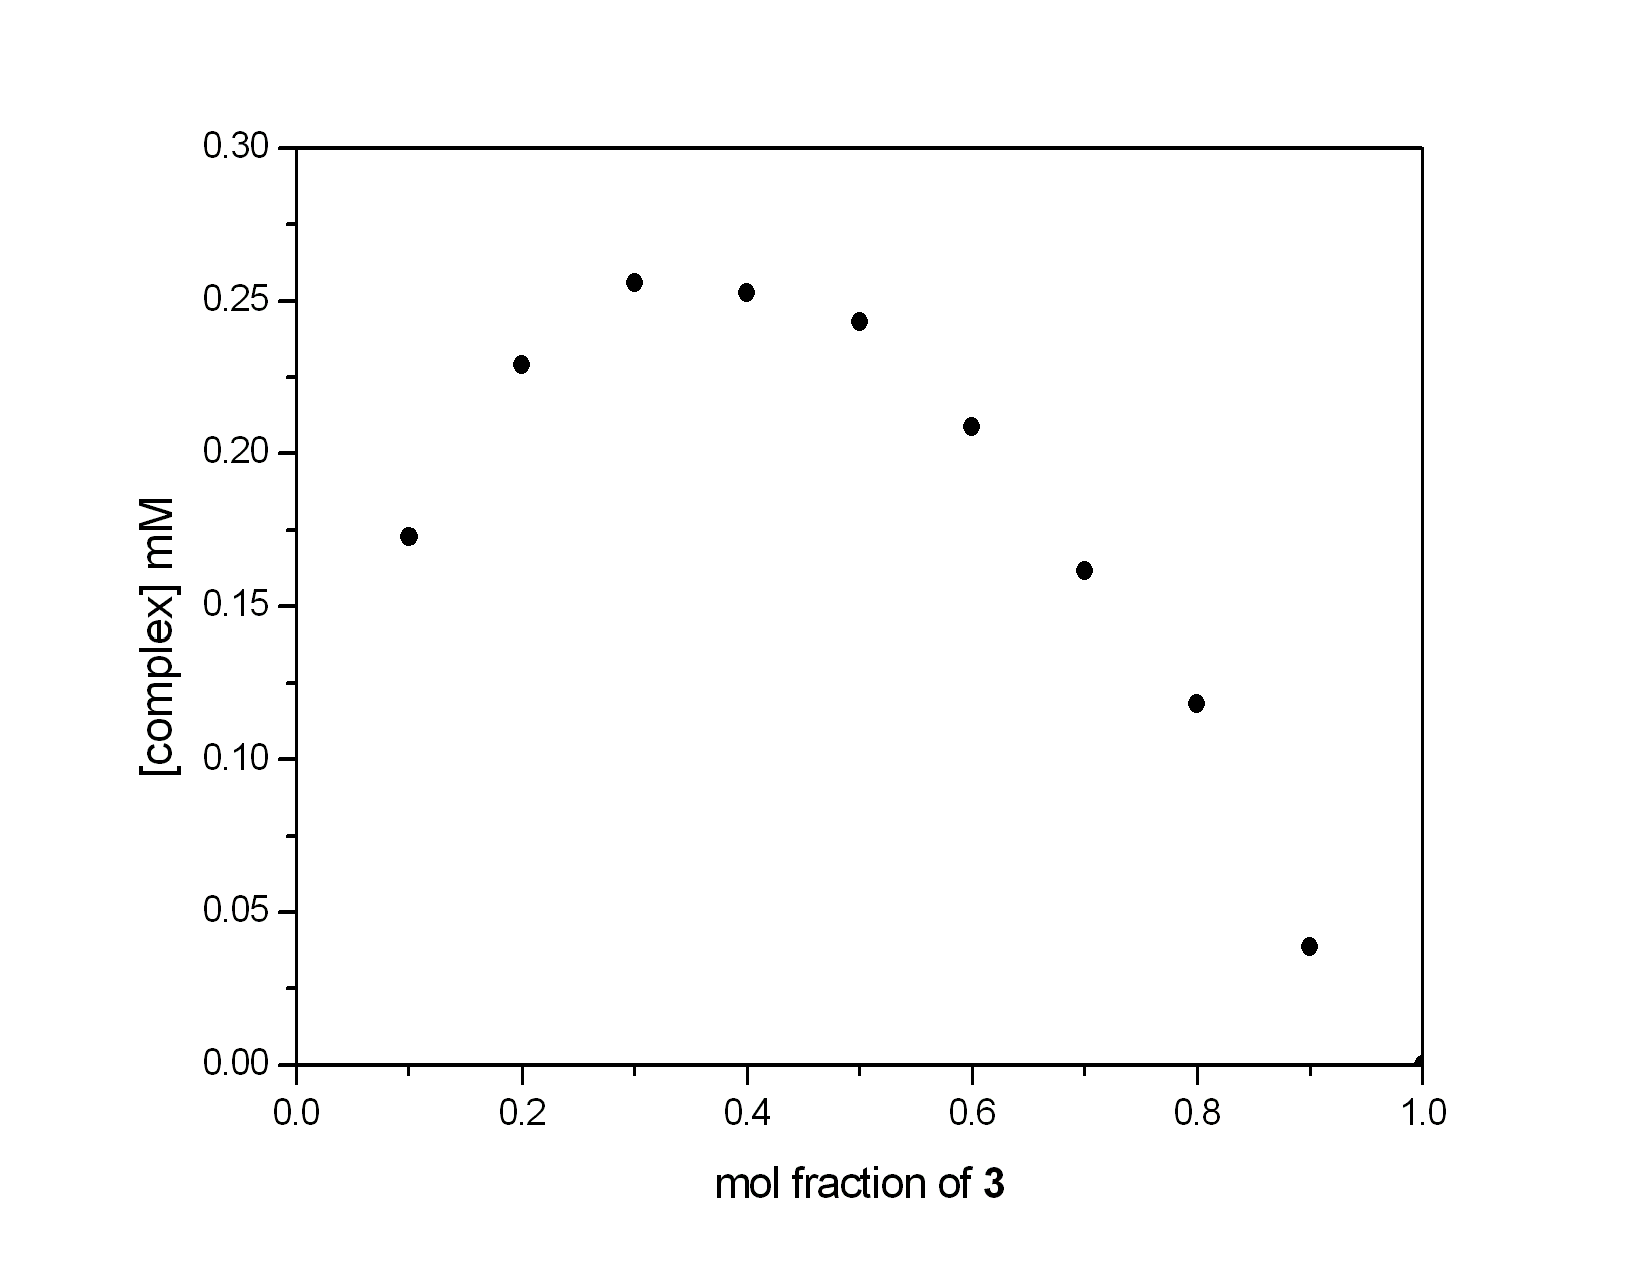

Supplement: b405331a.doc [file b405331a.doc]
